# Supplementary material for: Structural insights into broadly neutralizing antibodies elicited by hybrid immunity against SARS-CoV-2
Source: PubMed Central journal article supplement (PMC9817130; doi:10.1080/22221751.2022.2146538), 2023-01-03
Supplement: TEMI_A_2146538_SM6437.pdf [file TEMI_A_2146538_SM6437.pdf]

**A**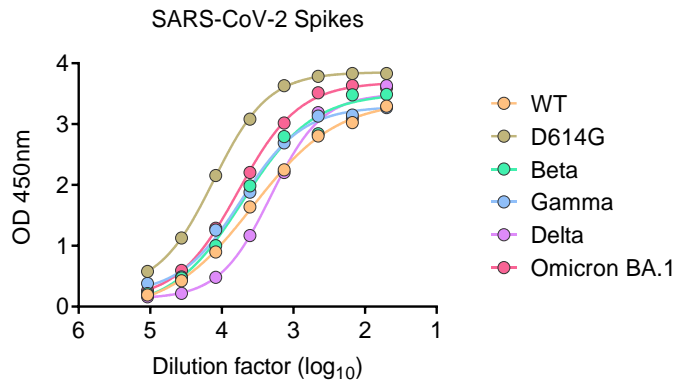**EC<sub>50</sub> (Dilution factor)**

|                     |       |
|---------------------|-------|
| <b>WT</b>           | 3696  |
| <b>D614G</b>        | 13038 |
| <b>Beta</b>         | 5104  |
| <b>Gamma</b>        | 5367  |
| <b>Delta</b>        | 2073  |
| <b>Omicron BA.1</b> | 5887  |

**B**

| Dilution factor        | WT    | D614G | Alpha | Beta | Gamma | Delta | BA.1  | BA.2 | BA.2.12.1 | BA.4/5 |
|------------------------|-------|-------|-------|------|-------|-------|-------|------|-----------|--------|
| <b>IC<sub>50</sub></b> | 11231 | 3869  | 5775  | 6777 | 4268  | 3274  | 3149  | 3738 | 2125      | 525.8  |
| <b>IC<sub>90</sub></b> | 593.4 | 282   | 1547  | 1324 | 289.7 | 115.4 | 411.2 | 222  | 232.1     | <150   |
| <b>NPI</b>             | 3.0   | 0.3   | N/A   | 1.3  | 0.8   | 1.6   | 0.5   | N/A  | N/A       | N/A    |

**Figure S1.** Characterization of reactive antibody responses recalled by Omicron BA.1 breakthrough infection. **(A)** The spike-specific binding activity of plasma derived from the patient Omicron-01 was measured by ELISA at serial dilutions. **(B)** The summary of IC<sub>50</sub> and IC<sub>90</sub> of plasma against pseudotyped SARS-CoV-2 WT and variants including Omicron sub-lineages. Neutralizing potency index (NPI) is also indicated.

## Omicron-01

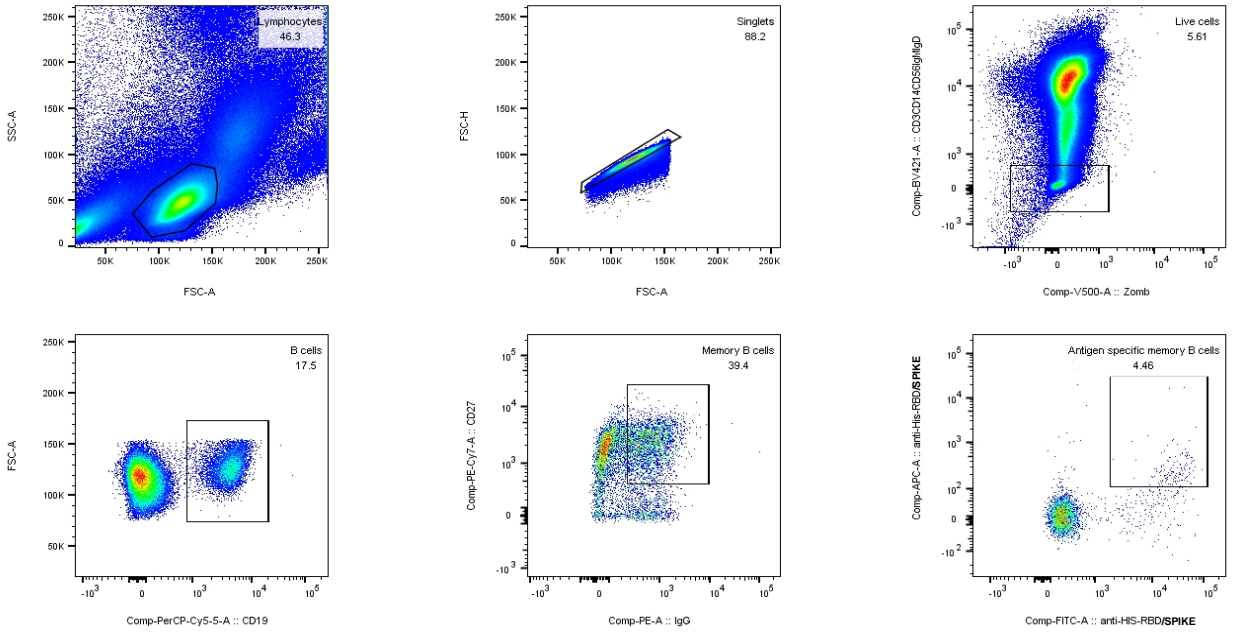

## Healthy donor

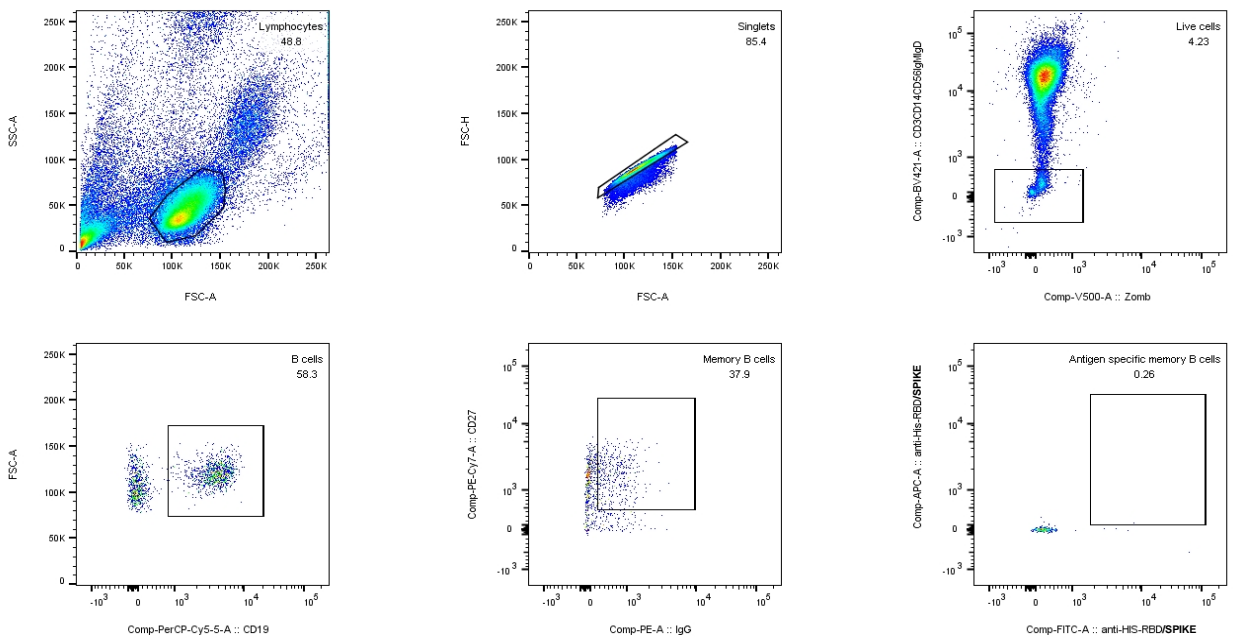

**Figure S2.** Isolation of antigen-specific immunoglobulin G-positive (IgG<sup>+</sup>) memory B cells. **(A)** FACS (Fluorescence-activated cell sorting) sorting of Omicron-01 PBMC into SARS-CoV-2 RBD/spike-specific CD19<sup>+</sup>CD27<sup>+</sup>IgG<sup>+</sup> subset. **(B)** FACS sorting of health donor PBMC as the negative control.

**A**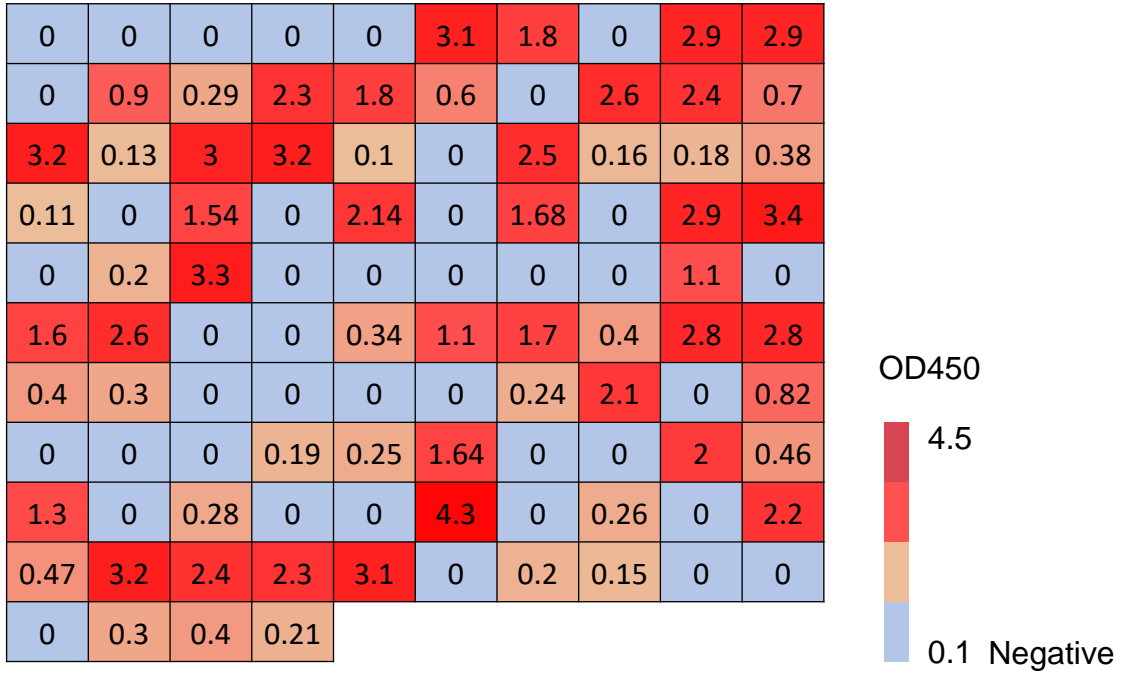**B**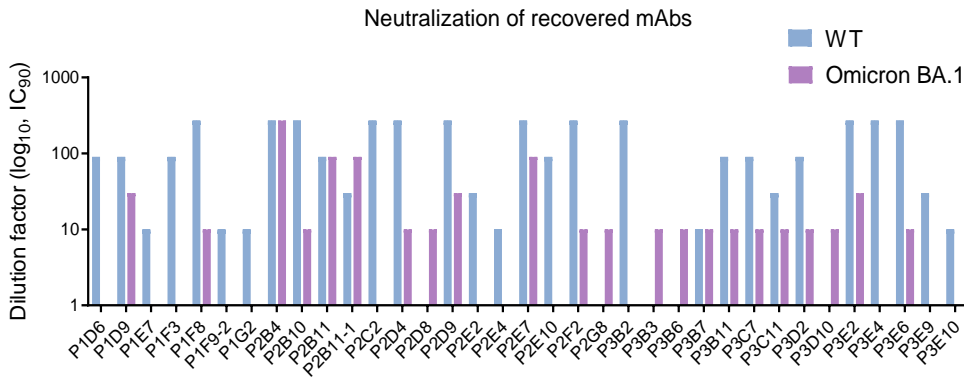**C**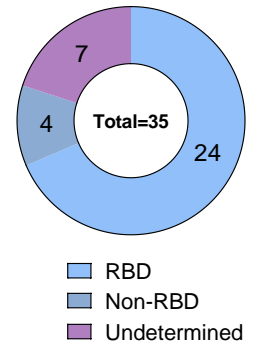

**Figure S3.** Binding and neutralization activity of recovered mAbs to SARS-CoV-2. **(A)** The binding activity of 104 recovered mAbs to SARS-CoV-2 WT spike was measured by ELISA. Those antibodies were successfully expressed by 293T cells and subjected to serial nonquantitative dilutions. Shown is the OD450 value of each antibody at the lowest dilution level, labelled in light blue, light orange, red and dark red from low to high value. **(B)** 35 selected mAbs with strong binding activity showed the neutralization response. Serial nonquantitative dilution assays were performed. The histogram summarizes the dilution factor of each antibody against SARS-CoV-2 WT and Omicron BA.1 with 90% neutralization. **(C)** Most of the 35 NAbs targeted WT RBD.

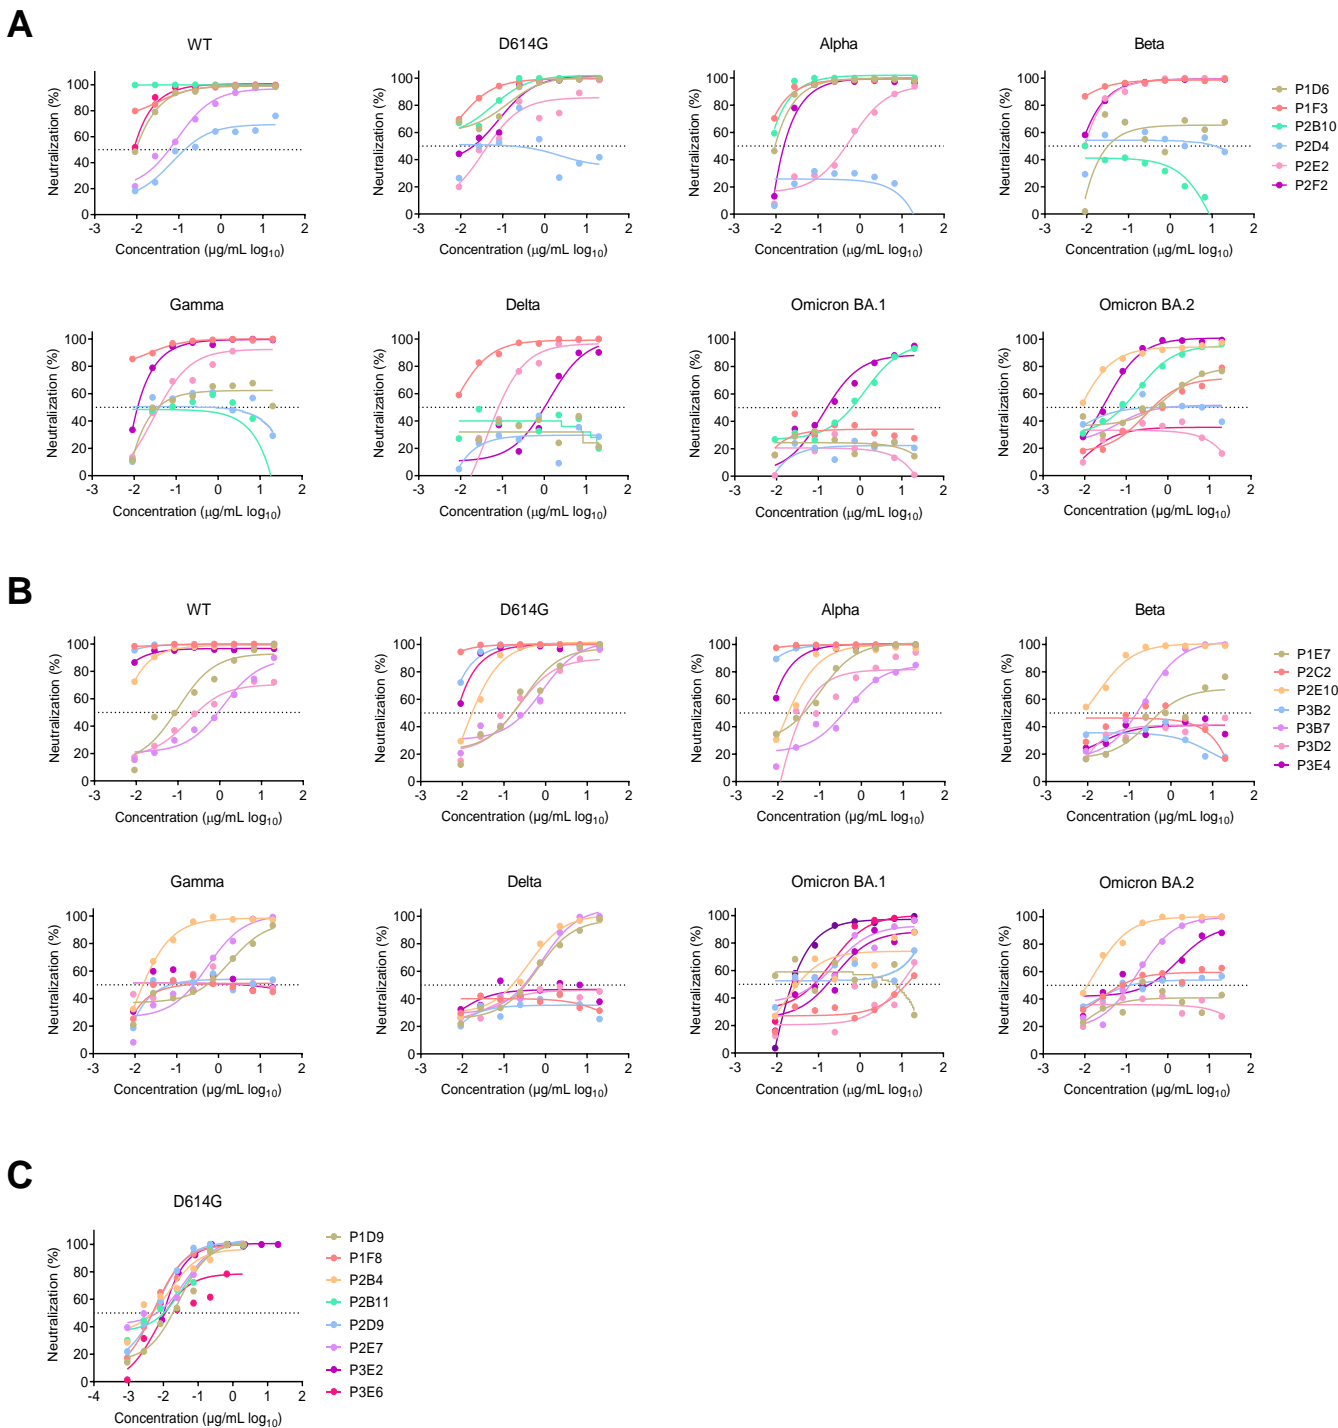

**Figure S4.** Quantitative neutralization measurement of newly identified NABs against pseudotyped SARS-CoV-2 WT and variants. **(A and B)** 13 of 35 NABs were selected based on their cross-neutralization capability and expressed by 293F cells for quantitative neutralization measurement against pseudotyped SARS-CoV-2 WT and variants. The dashed line in each graph indicates 50% neutralization. **(C)** 8 of 35 NABs were selected based on their potent neutralization against Omicron sub-lineages and expressed by 293F cells for quantitative neutralization measurement against pseudotyped SARS-CoV-2 D614G variant.

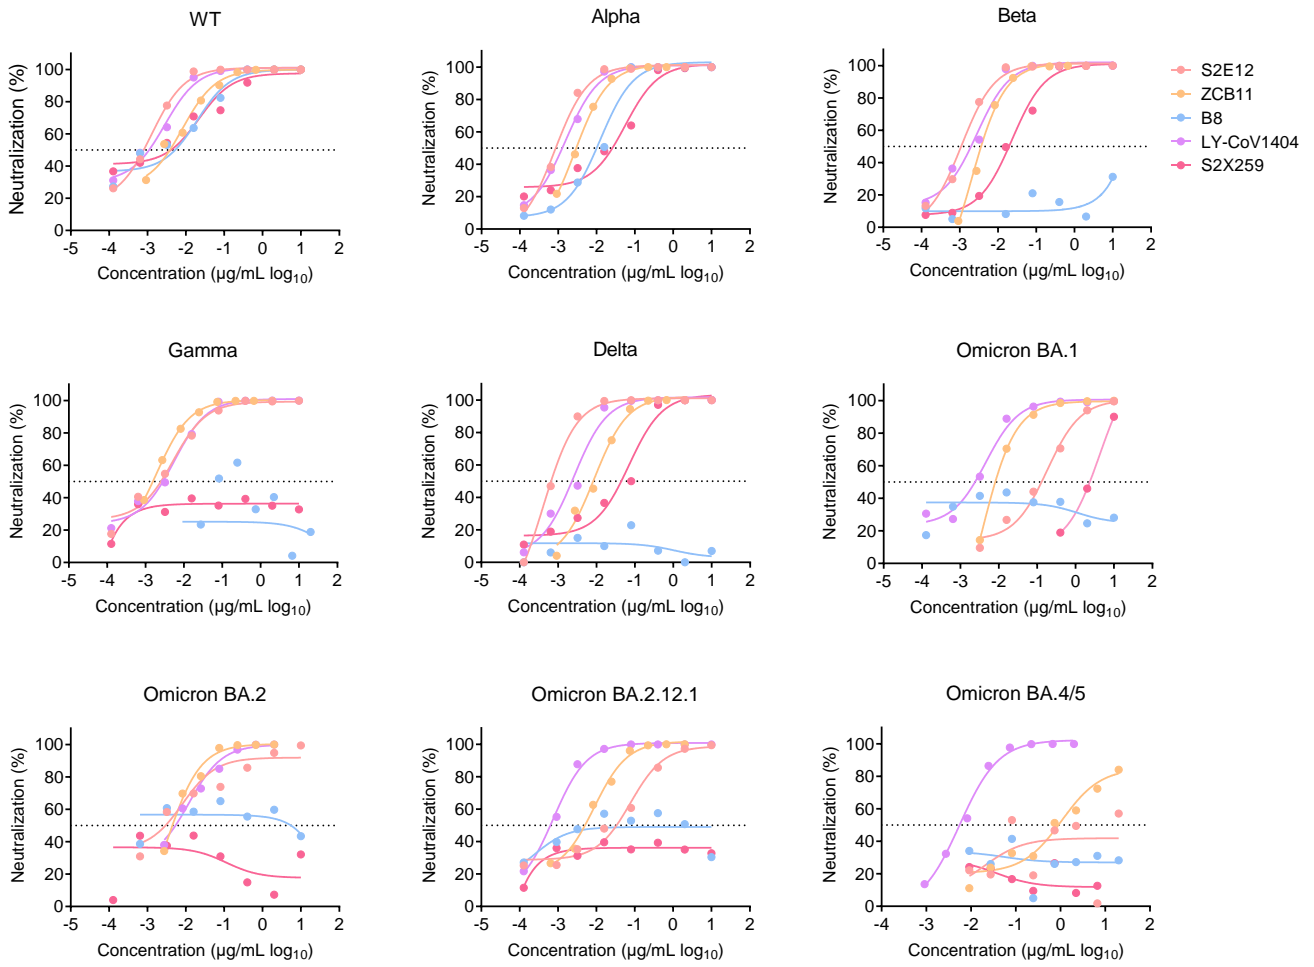

**Figure S5.** Quantitative neutralization measurement of published NAb controls from class I-IV (S2E12, ZCB11, B8, LY-CoV1404 and S2X259) against pseudotyped SARS-CoV-2 WT and variants.

## S2E12

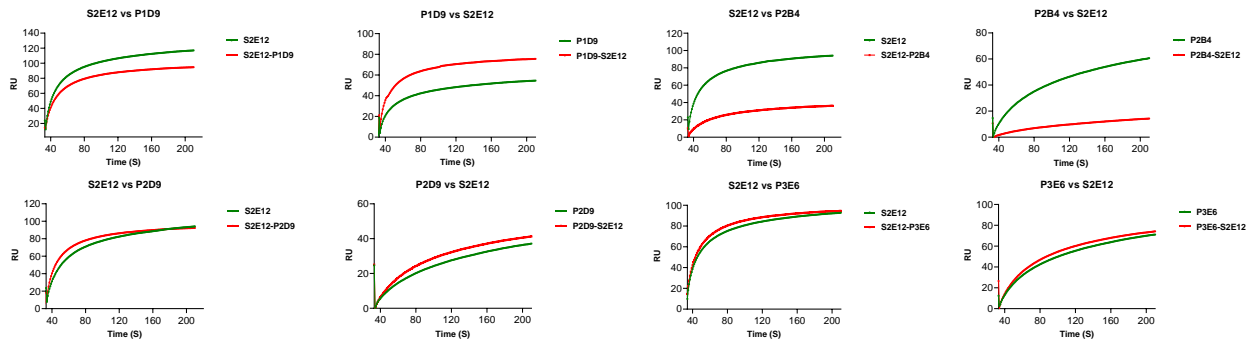

## B8

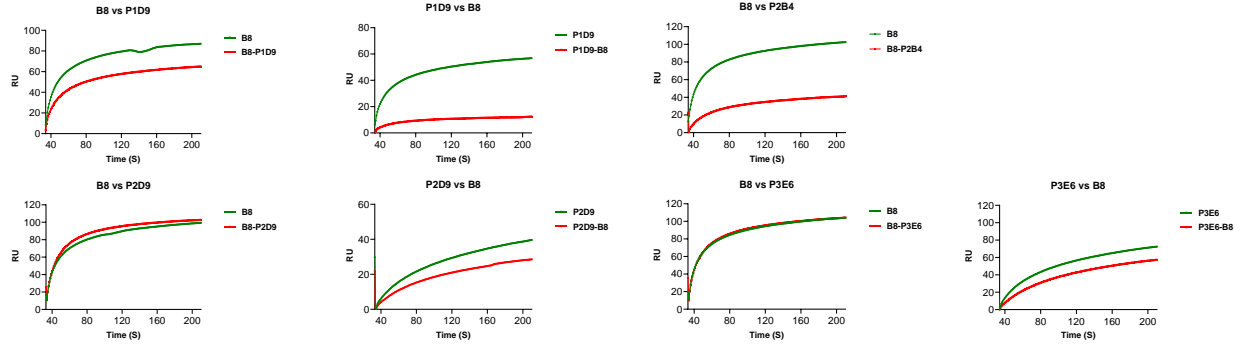

## LY-CoV1404

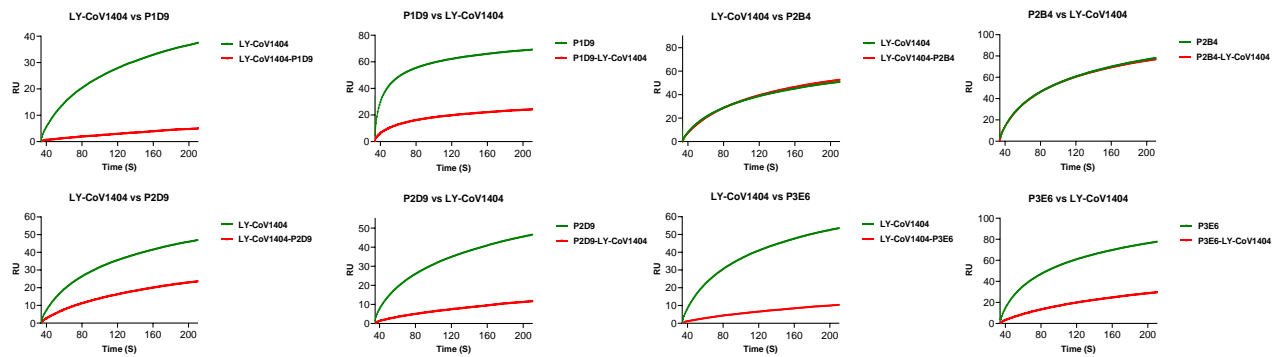

## S2X259

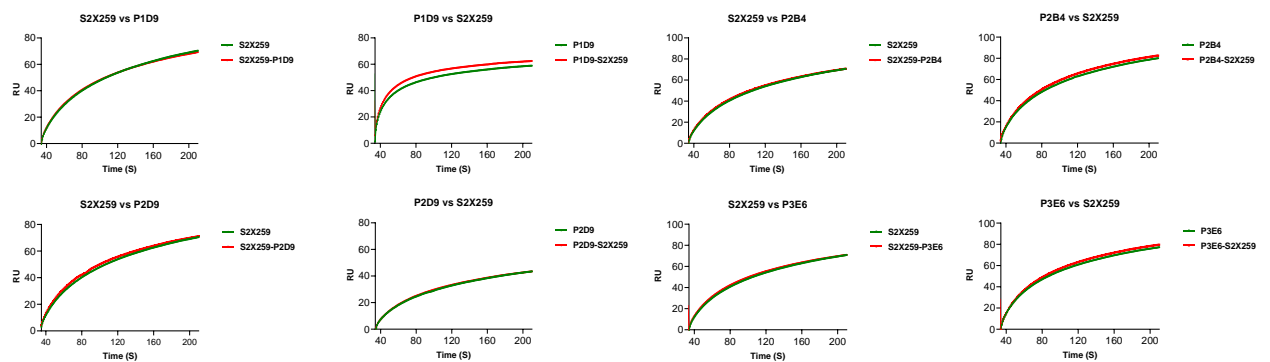

**Figure S6.** Competitive binding between 4 identified NABs and published NABs to SARS-CoV-2 WT RBD. The competition between 4 NABs (P1D9, P2B4, P2D9 and P3E6) and published NABs (S2E12, B8, LY-CoV1404 and S2X259) for binding to SARS-CoV-2 WT RBD was measured by surface plasmon resonance (SPR). The curves show the binding of each NAb to SARS-CoV-2 RBD without (green) or with (red) pre-incubation of competitor NAb.

## P2B11

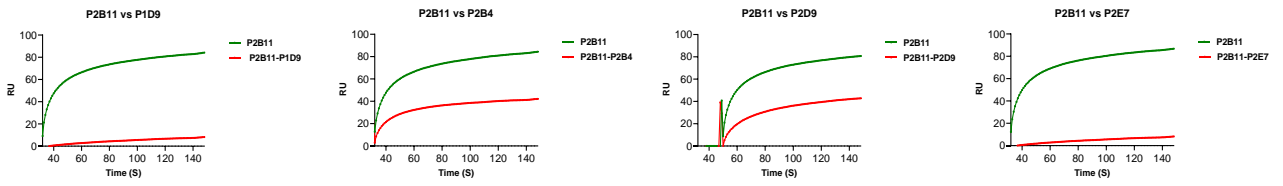

## P2E7

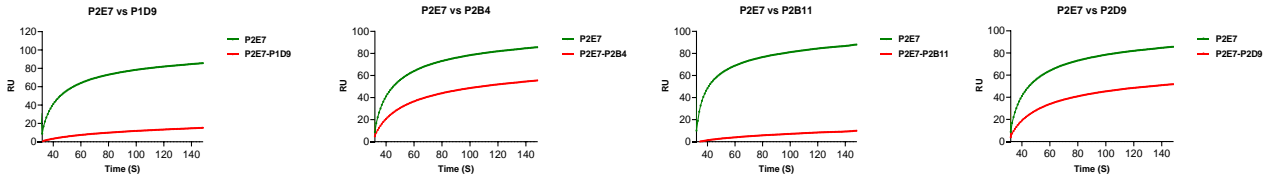

## P1D9

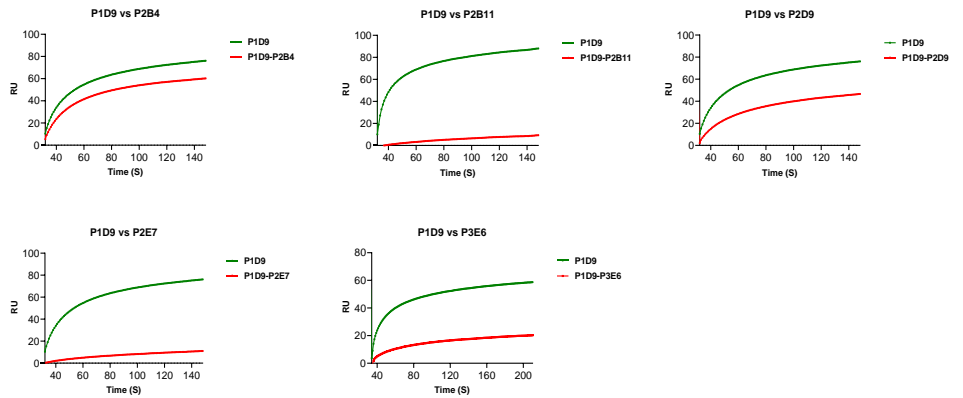

## P1F8 vs P2B4

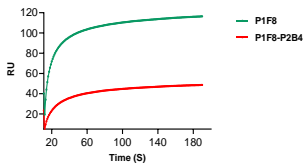

## P2D9

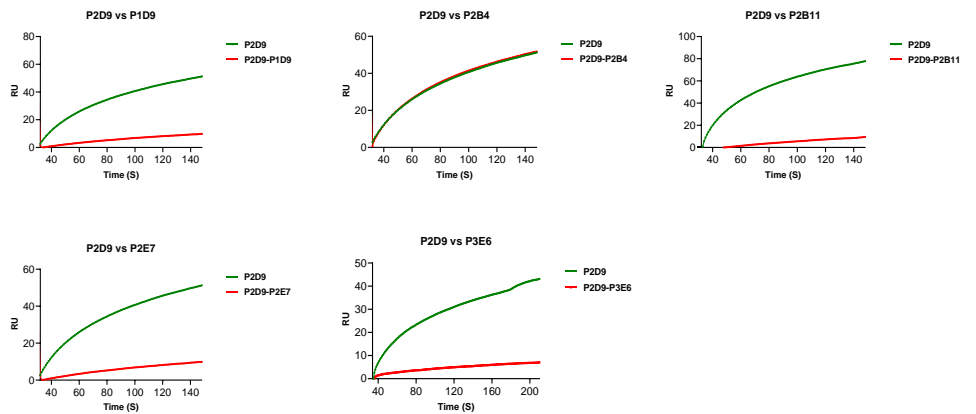

## P3E2 vs P2B4

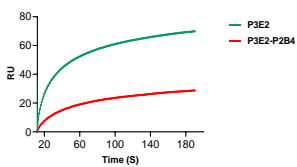

## P3E6

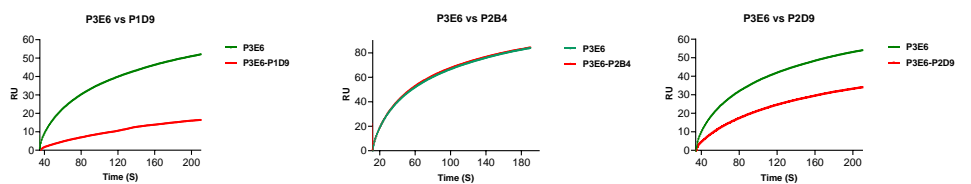

**Figure S7.** Competitive binding between 8 identified NAbs to SARS-CoV-2 WT RBD. The competition between 8 NAbs (P1F8, P3E2, P2B11, P2E7, P2B4, P1D9, P2D9, and P3E6) for binding to SARS-CoV-2 WT RBD was measured by surface plasmon resonance (SPR). The curves show the binding of each NAb to SARS-CoV-2 RBD without (green) or with (red) pre-incubation of competitor NAb.

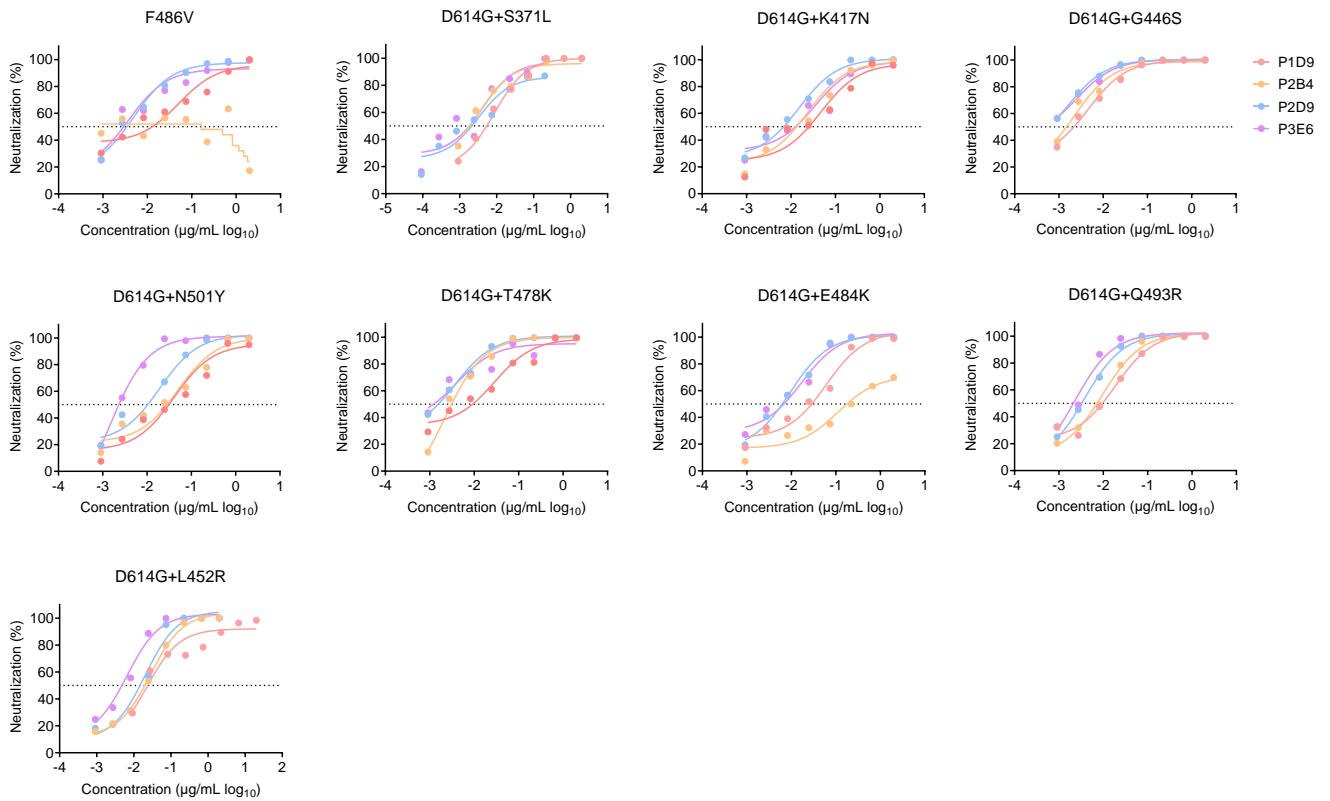

**Figure S8.** Identified Class II/III NAb display diverse neutralization activity against SARS-CoV-2 WT pseudovirus with point substitutions. The neutralization activity of P2B4, P1D9, P2D9 and P3E6 against pseudotyped SARS-CoV-2 WT with F486V or D614G plus the indicated point substitutions found within the RBD. The dashed line in each graph indicates 50% neutralization.



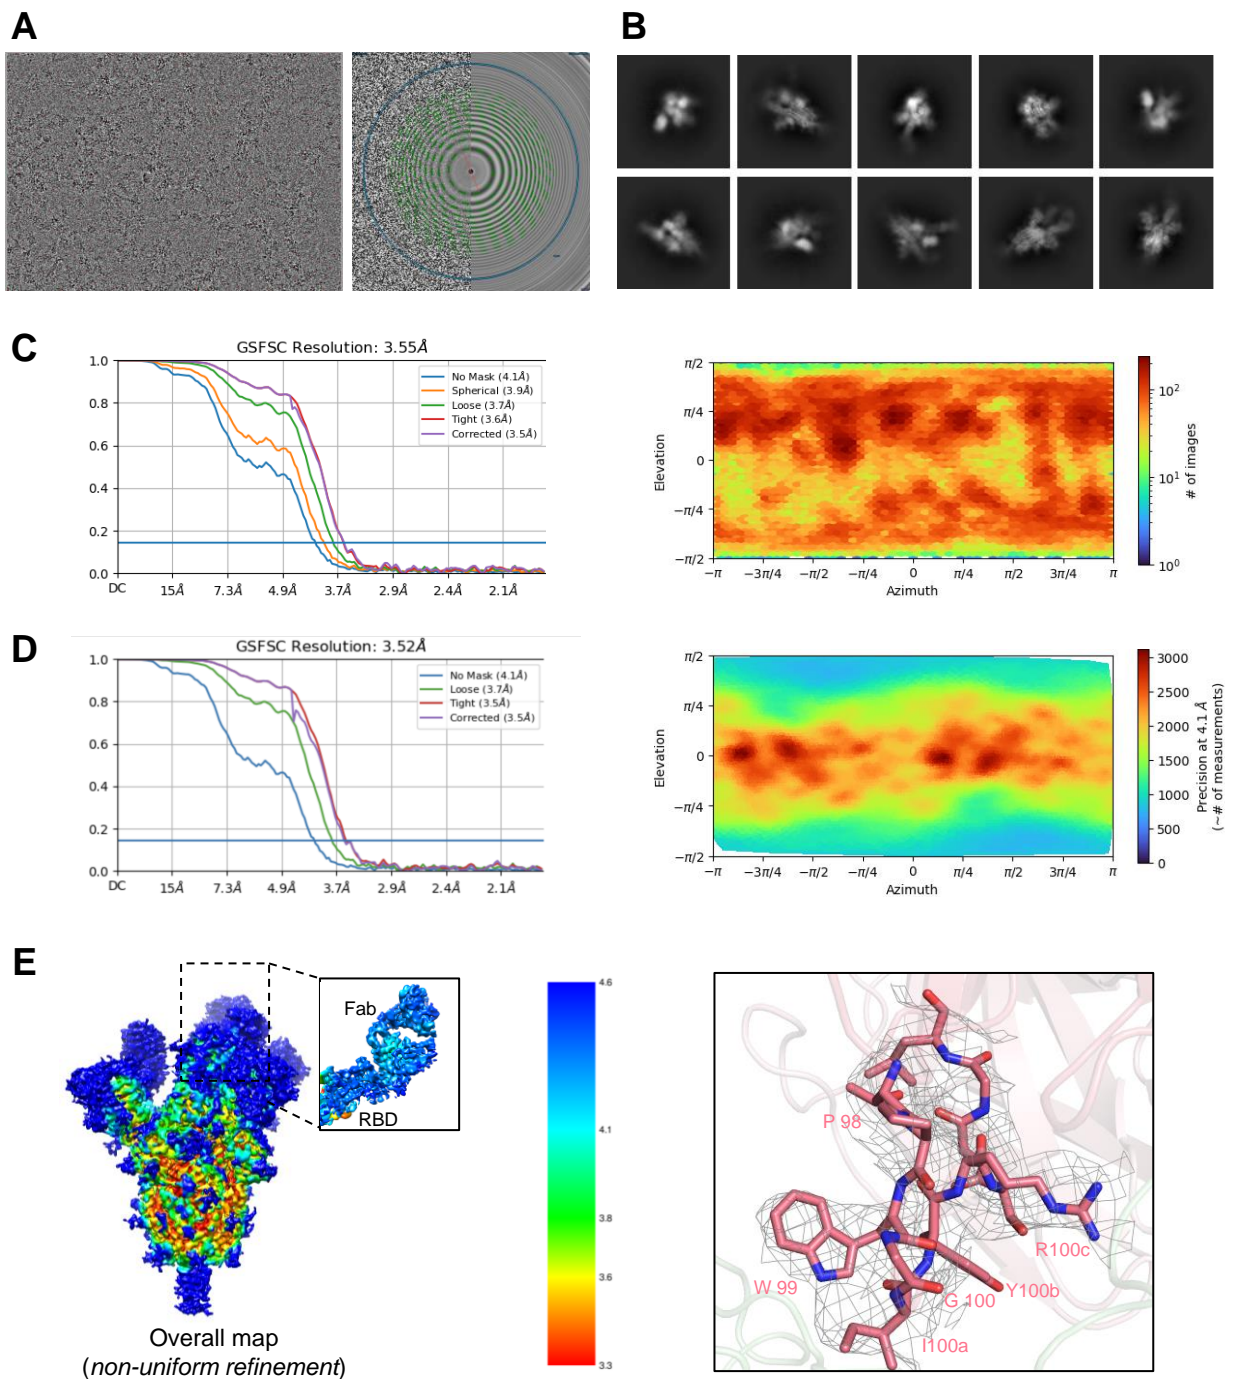

**Figure S9.** Cryo-EM details of P2B4 Fab in complex with SARS-CoV-2 WT 2P spike. **(A)** Representative micrograph and CTF of the micrograph are shown. Cryo-EM structure of SARS-CoV-2 WT 2P spike in complex with P2B4 Fab at 3.5 Å resolution. **(B)** Representative 2D class averages are shown. **(C)** The gold-standard Fourier shell correlation resulted in a resolution of 3.55 Å for the overall map using non-uniform refinement (left panel); the orientations of all particles used in the final refinement are shown as a heatmap (right panel); the observed preferred orientation did not preclude the generation of a high-quality map. **(D)** The gold-standard Fourier shell correlation resulted in a resolution of 3.9 Å for the masked local refinement of the RBD:P2B4 interface (left panel); the orientations of all particles used in the local refinement are shown as a heatmap (right panel). the observed preferred orientation did not preclude the generation of a high-quality map. **(E)** The local resolution of the final overall map and locally refined map are shown, generated through cryoSPARC using an FSC cutoff of 0.5. Representative density is shown for the CDR H3 loop of P2B4 contacting NTD. CDR H3 carbon atoms are colored in red, oxygen in red, nitrogen in blue; RBD is colored in pale green.

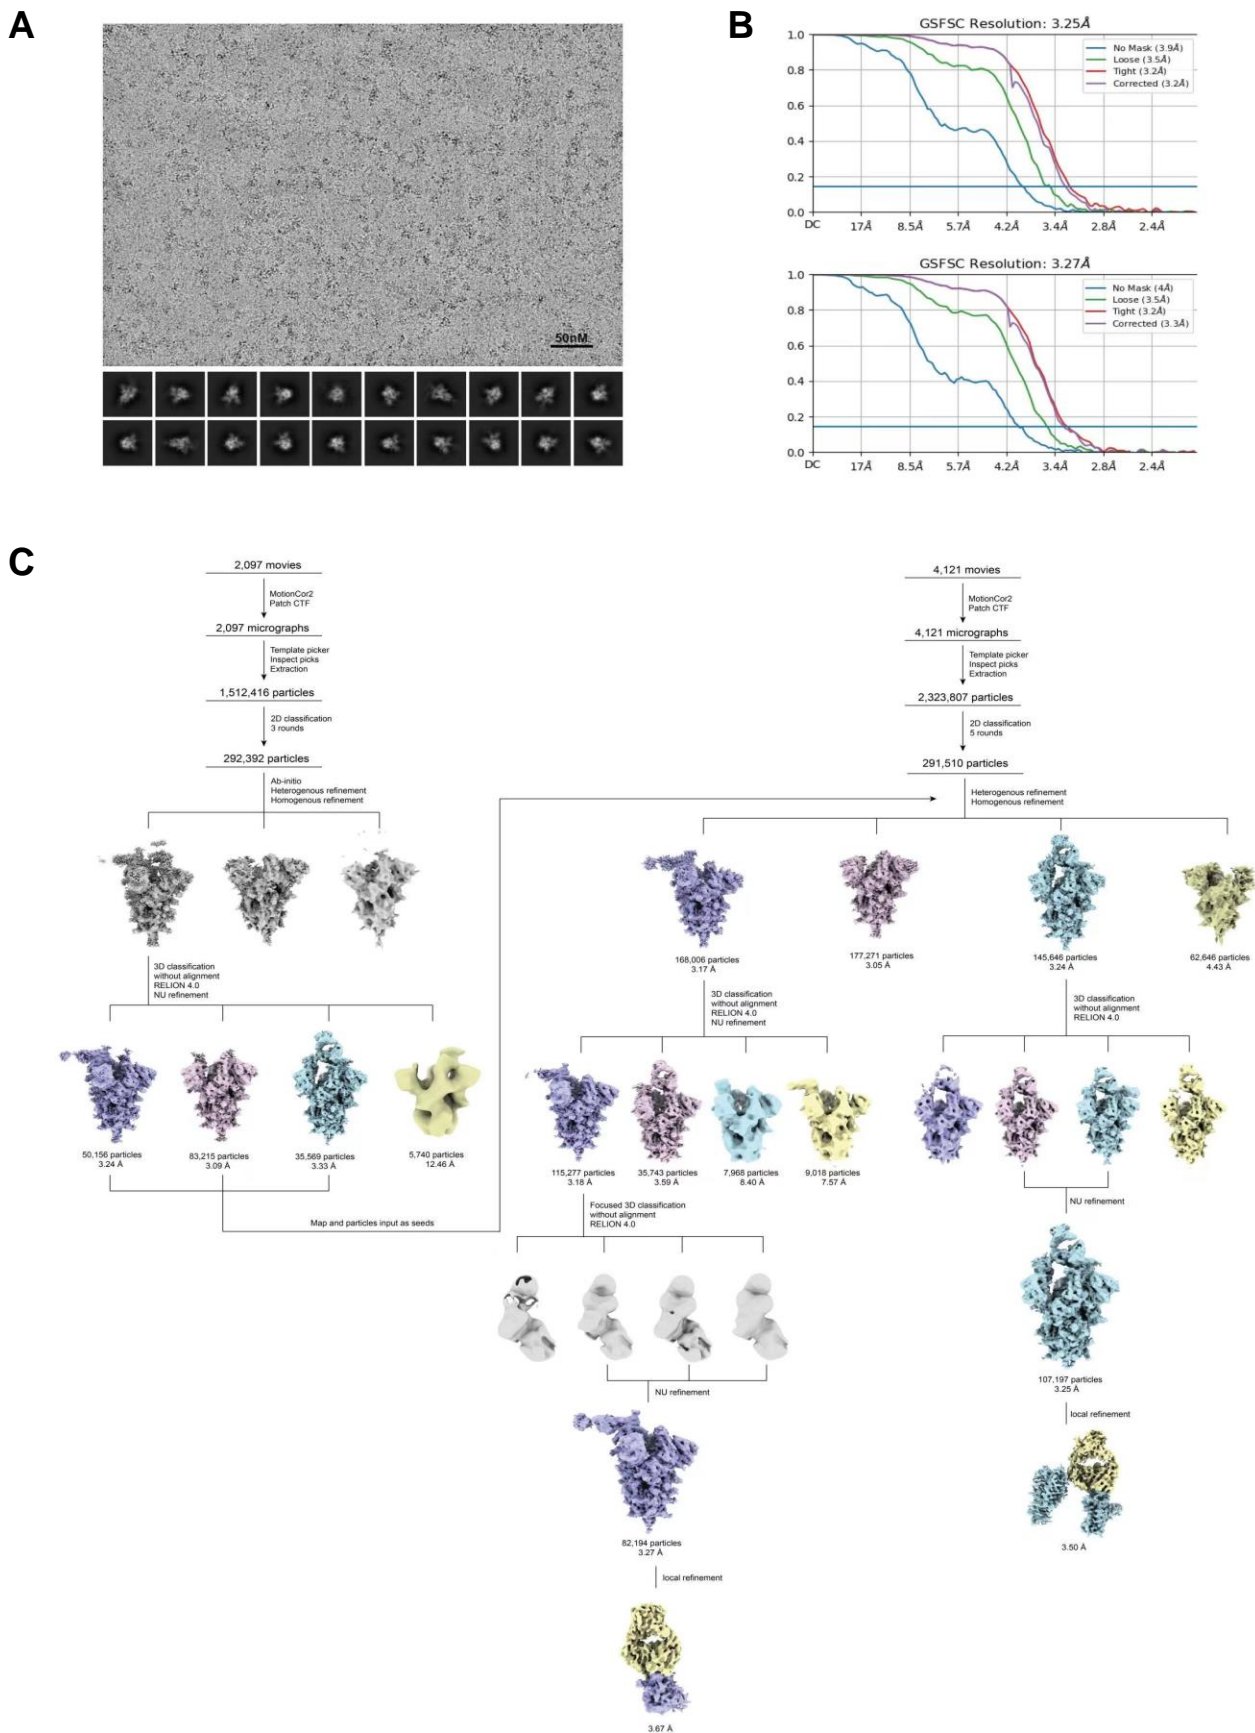

**A**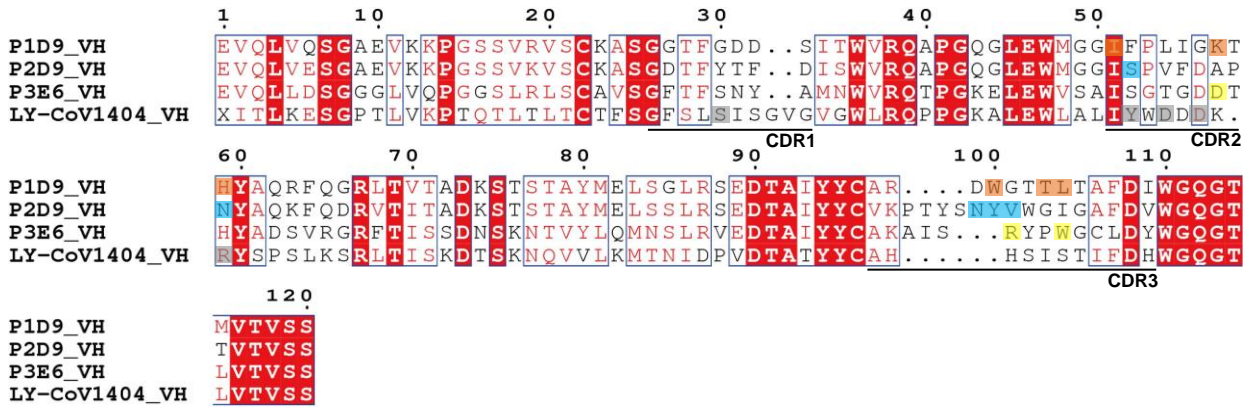**B**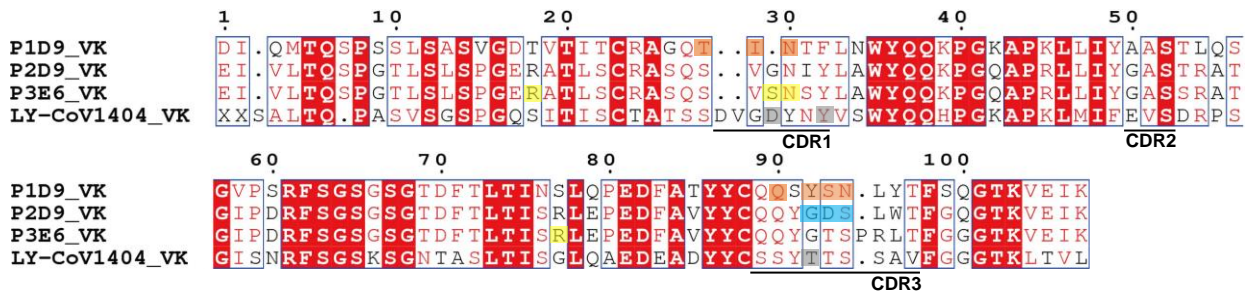

**Figure S11.** Sequence alignment of class III P1D9, P2D9, P3E6 and LY-CoV1404 variable regions. **(A)** Sequence alignment of VH. The residues of P1D9, P2D9, P3E6 and LY-CoV1404 VH (GenBank accession: 7MMO\_A) involved in binding RBD are labelled in orange, blue, yellow and grey, respectively. CDR1/2/3 are indicated. **(B)** Sequence alignment of VL. The residues of P1D9, P2D9, P3E6 and LY-CoV1404 VL (GenBank accession: 7MMO\_B) involved in binding RBD are labelled in orange, blue, yellow and grey, respectively. CDR1/2/3 are indicated.

**Table S1.** The WT RBD-specific binding activity of 35 NAbs was measured by ELISA

|              |       |         |       |       |       |        |       |       |       |
|--------------|-------|---------|-------|-------|-------|--------|-------|-------|-------|
| Antibody     | P1D6  | P1D9    | P1E7  | P1F3  | P1F8  | P1F9-2 | P1G2  | P2B4  | P2B10 |
| EC50 (ug/ml) | 0.015 | 0.007   | 0.039 | 0.011 | 0.008 | N/A    | N/A   | 0.012 | 0.013 |
| Antibody     | P2B11 | P2B11-1 | P2C2  | P2D4  | P2D8  | P2D9   | P2E2  | P2E4  | P2E7  |
| EC50 (ug/ml) | N/A   | 0.012   | 0.015 | 0.172 | N/A   | 0.028  | 0.026 | N/A   | 0.010 |
| Antibody     | P2E10 | P2F2    | P2G8  | P3B2  | P3B3  | P3B6   | P3B7  | P3B11 | P3C7  |
| EC50 (ug/ml) | 0.006 | 0.007   | --    | 0.012 | N/A   | N/A    | 12.63 | 0.078 | 0.093 |
| Antibody     | P3C11 | P3D2    | P3D10 | P3E2  | P3E4  | P3E6   | P3E9  | P3E10 |       |
| EC50 (ug/ml) | --    | 0.064   | 0.188 | 0.163 | 0.013 | 0.114  | --    | --    |       |

N/A: The binding activity of 7 NAbs was not determined.

**Table S2.** Neutralization profiles of 21 NAbs

| Antibody     | Neutralization |       |       |      |       |       |              |              | IC <sub>50</sub> (ng/mL) | Symbol |
|--------------|----------------|-------|-------|------|-------|-------|--------------|--------------|--------------------------|--------|
|              | WT             | D614G | Alpha | Beta | Gamma | Delta | Omicron BA.1 | Omicron BA.2 |                          |        |
| P1D6         | ***            | ***   | ***   | X    | X     | X     | X            | X            | 1-10                     | ***    |
| <b>P1D9</b>  | ***            | **    | **    | ***  | X     | X     | **           | **           | 10-100                   | **     |
| P1E7         | **             | *     | **    | X    | *     | X     | X            | X            | 100-1000                 | *      |
| P1F3         | ***            | ***   | ***   | ***  | ***   | ***   | X            | X            | >1000                    | x      |
| <b>P1F8</b>  | ***            | ***   | ***   | X    | X     | X     | **           | ***          |                          |        |
| <b>P2B4</b>  | **             | **    | **    | X    | X     | **    | ***          | ***          |                          |        |
| P2B10        | ***            | ***   | ***   | X    | X     | X     | *            | *            |                          |        |
| <b>P2B11</b> | **             | **    | **    | ***  | X     | X     | **           | **           |                          |        |
| P2C2         | ***            | ***   | ***   | X    | X     | X     | X            | X            |                          |        |
| P2D4         | **             | X     | X     | X    | X     | X     | X            | X            |                          |        |
| <b>P2D9</b>  | ***            | ***   | ***   | ***  | ***   | ***   | **           | *            |                          |        |
| P2E2         | **             | **    | *     | ***  | **    | **    | X            | X            |                          |        |
| <b>P2E7</b>  | ***            | **    | **    | ***  | ***   | X     | **           | **           |                          |        |
| P2E10        | ***            | ***   | **    | ***  | **    | *     | **           | **           |                          |        |
| P2F2         | ***            | **    | **    | ***  | ***   | *     | *            | **           |                          |        |
| P3B2         | ***            | ***   | ***   | X    | X     | X     | *            | X            |                          |        |
| P3B7         | *              | *     | *     | *    | *     | *     | X            | *            |                          |        |
| P3D2         | *              | *     | *     | X    | X     | X     | *            | X            |                          |        |
| <b>P3E2</b>  | **             | ***   | **    | ***  | **    | X     | **           | **           |                          |        |
| P3E4         | ***            | ***   | ***   | X    | X     | X     | *            | X            |                          |        |
| <b>P3E6</b>  | **             | ***   | **    | **   | **    | **    | ***          | **           |                          |        |

Note: 8 bNAbs that neutralize Omicron variants potentially are in bold for further analysis.

**Table S3.** Profile of WT 2P spike in complex with P2B4 Fab

| SARS-CoV-2 WT 2P spike complex                  | P2B4 Fab                                |
|-------------------------------------------------|-----------------------------------------|
| EMDB ID                                         | 27775                                   |
| PDB ID                                          | 8DXS                                    |
| <u>Data Collection</u>                          |                                         |
| Microscope                                      | FEI Titan Krios                         |
| Voltage (kV)                                    | 300                                     |
| Electron dose (e <sup>-</sup> /Å <sup>2</sup> ) | 41.92                                   |
| Detector                                        | Gatan K3 BioQuantum                     |
| Pixel Size (Å)                                  | 1.07                                    |
| Defocus Range (µm)                              | -0.8/-2.5                               |
| Magnification                                   | 81000                                   |
| <u>Reconstruction</u>                           |                                         |
| Software                                        | cryoSPARC v3.3.2                        |
| Particles                                       | 93,569                                  |
| Symmetry                                        | C1                                      |
| Box size (pix)                                  | 392                                     |
| Resolution (Å) (FSC <sub>0.143</sub> )          | 3.52                                    |
| <u>Refinement</u>                               |                                         |
| Software                                        | UCSF Chimera, ChimeraX, Coot,<br>Phenix |
| Protein residues                                | 3791                                    |
| Chimera CC                                      | 0.85                                    |
| EMRinger Score                                  | 2.43                                    |
| R.m.s. deviations                               |                                         |
| Bond lengths (Å)                                | 0.006                                   |
| Bond angles (°)                                 | 1.16                                    |
| <u>Validation</u>                               |                                         |
| Molprobity score                                | 1.41                                    |
| Clash score                                     | 4.64                                    |
| Favored rotamers (%)                            | 2.1                                     |
| Ramachandran                                    |                                         |
| Favored regions (%)                             | 97.0                                    |
| Allowed regions (%)                             | 3.0                                     |
| Disallowed regions (%)                          | 0                                       |

**Table S4.** Profile of WT RBD in complex with P1D9 or P2D9 Fabs

| SARS-CoV-2 WT RBD complex               | P1D9 Fab                         | P2D9 Fab                                       |
|-----------------------------------------|----------------------------------|------------------------------------------------|
| PDB ID                                  | 8DWA                             | 8DW9                                           |
| <u>Data Collection</u>                  |                                  |                                                |
| Space group                             | P4 <sub>2</sub> 2 <sub>1</sub> 2 | P 2 <sub>1</sub> 2 <sub>1</sub> 2 <sub>1</sub> |
| Unit cell dimensions                    |                                  |                                                |
| a,b,c (Å)                               | 147.1 147.1 80.1                 | 80.1 106.7 207.6                               |
| a,b,g (°)                               | 90.0,90.0, 90.0                  | 90.0, 90.0, 90.0                               |
| Resolution range (Å)                    | 54.1 – 2.8 (2.9-2.8)*            | 94.1 - 3.95 (3.8- 3.9)*                        |
| Total reflections                       | 394608 (40880)                   | 33813 (3332)                                   |
| Unique reflections                      | 14941 (1449)                     | 13088 (1296)                                   |
| Completeness (%)                        | 99.3 (99.6)                      | 92.6 (82.4)                                    |
| Redundancy                              | 26.4 (28.2)                      | 2.6 (2.6)                                      |
| I/s(I)                                  | 15.2 (1.68)                      | 3.3 (3.1)                                      |
| Rmerge                                  | 0.018(0.25)                      | 0.37 (0.89)                                    |
| CC1/2                                   | 1.0 (0.89)                       | 0.98 (0.65)                                    |
| <u>Refinement</u>                       |                                  |                                                |
| Resolution range (Å)                    | 54.1-2.82                        | 94.1 - 3.95                                    |
| Number of complexes per asymmetric unit | 1                                | 2                                              |
| Rwork/Rfree                             | 0.21/0.29                        | 0.31/0.37                                      |
| Number of atoms                         |                                  |                                                |
| Protein                                 | 596                              | 1208                                           |
| Ligands                                 | 27                               | 0                                              |
| Water                                   | 0                                | 0                                              |
| B-factors                               |                                  |                                                |
| Protein                                 | 82.1                             | 82.9                                           |
| Ligands                                 | 81.5                             | 0                                              |
| Water                                   | 0                                | 0                                              |
| R.m.s. deviations                       |                                  |                                                |
| Bond lengths (Å)                        | 0.017                            | 0.005                                          |
| Bond angles (°)                         | 1.79                             | 0.84                                           |
| Ramachandran statistics                 |                                  |                                                |
| Favored (%)                             | 96.34                            | 90.64                                          |
| Allowed (%)                             | 3.66                             | 9.36                                           |
| Outliers (%)                            | 0                                | 0                                              |

**Table S5.** Profile of BA.1 spike in complex with P3E6 Fab

| SARS-CoV-2 Omicron BA.1 spike complex | P3E6 Fab                             |
|---------------------------------------|--------------------------------------|
| EMDB ID                               | 33893, 33894                         |
| PDB ID                                | 7YKJ                                 |
| <u>Data Collection</u>                |                                      |
| Microscope                            | Titan Krios                          |
| Voltage(kV)                           | 300                                  |
| Detector                              | Gatan K3 summit                      |
| Magnification                         | 81,000x                              |
| Electron dose (e/Å <sup>2</sup> )     | 50                                   |
| Defocus range (μm)                    | -1.0~-2.5                            |
| Pixel size (Å)                        | 1.06                                 |
| Collected movies                      | 6,218                                |
| <u>Reconstruction</u>                 |                                      |
| Software                              | cryoSPARC v 3.3.2, RELION 4.0        |
| Final particles                       | 107,197                              |
| B-factors (Å <sup>2</sup> )           | -124.5                               |
| Map resolution (Å)                    | 3.50(0.143)                          |
| <u>Atomic modeling</u>                |                                      |
| Software                              | UCSF Chimera, ChimeraX, Coot, Phenix |
| Chain                                 | 4                                    |
| Residues                              | 626                                  |
| Water                                 | 0                                    |
| Atoms                                 | 4811 (Hydrogens:0)                   |
| RMSD Length (Å)                       | 0.013                                |
| RMSD Angles (Å)                       | 1.781                                |
| <u>Ramachandran plot (%)</u>          |                                      |
| Favored                               | 92.23                                |
| Allowed                               | 6.63                                 |
| Outliers                              | 1.13                                 |
| Rotamer outliers                      | 2.98                                 |
| C-beta outliers                       | 0.17                                 |



**Table S6.** Memory B cell-derived IgGH and IgGV genes of 8 newly identified bNAbs

| Antibody | IGHV gene   | IGKV gene   | HCDR3             | HCDR3 length | Total identity |
|----------|-------------|-------------|-------------------|--------------|----------------|
| P1D9     | IGHV1-69*06 | IGKV1-39*01 | ARDWGTTLTAFDI     | 13           | 90.8%          |
| P1F8     | IGHV3-64*01 | IGKV2-28*01 | ARGRRDVYTGGFDV    | 14           | 92.2%          |
| P2B4     | IGHV3-9*01  | IGKV1-39*01 | AKETTPWGIYRSGGLDV | 17           | 94.3%          |
| P2B11    | IGHV1-69*06 | IGKV3-20*01 | ARPIQPFGDYALDV    | 14           | 94.9%          |
| P2D9     | IGHV1-69*06 | IGKV3-20*01 | VKPTYSNYVWGIGAFDV | 17           | 93.1%          |
| P2E7     | IGHV4-59*01 | IGKV2-28*01 | ARGTTYTGFDVEWFDP  | 16           | 94.9%          |
| P3E2     | IGHV3-53*01 | IGKV1-39*01 | VRMMTGTDWFDP      | 12           | 94.2%          |
| P3E6     | IGHV3-23*01 | IGKV3-20*01 | AKAISRYPWGCLDY    | 14           | 92.9%          |
